# Supplementary material
Source: publisher figshare collection journal article supplement (https://aacr.figshare.com/articles/dataset/_/22380101)
Supplement: Supplementary file 1 [file 39825503]

## Supplemental Figure legends

### Sup.Fig1

Gas chromatographic analysis of fatty acids in the cells treated with 17 $\beta$ -HSD12 specific siRNA. Total fatty acid (a) and arachidonic acid (b) levels of the cells treated with 17 $\beta$ -HSD12 specific siRNA(#108811) was lower than that of the negative control cells.

### Sup.Fig2

Dose dependent growth recovery of SK-BR-3 cells transfected with 17 $\beta$ -HSD12 siRNAs by arachidonic acid. Cell proliferation of SK-BR-3 was significantly inhibited by 17 $\beta$ -HSD12 knockdown compared to negative controls in serum free condition. The growth inhibition was recovered by an addition of arachidonic acid in a dose dependent manner. Data are presented as mean  $\pm$  S.D. (n=4).
